# Supplementary material for: Toxicological Profile of Ultrapure 2,2′,3,4,4′,5,5′-Heptachlorbiphenyl (PCB 180) in Adult Rats
Source: PLoS One. 2014 Aug 19;9(8):e104639. doi: 10.1371/journal.pone.0104639 (PMC4138103; doi:10.1371/journal.pone.0104639)
Supplement: Table S6 — Tissue retinoid concentrations. (XLSX) [file pone.0104639.s006.xlsx]

## Sheet: Table S6
Table S6. Tissue retinoid concentrations
	Liver			Liver																		Kidney									Serum
Total dose mg/kg bw				Retinol nmol/g			Retinyl esters µmol/g			All-trans RA pmol/g			9-cis-4o-13,14-dh-RA pmol/g			Retinol (pmol/ml)			Retinyl esters (pmol/ml)			Retinol nmol/g			Retinyl esters nmol/g			All-trans RA pmol/g			Retinol pmol/ml			Retinyl esters pmol/ml
males
0				22.78	±	2.377	0.976	±	0.09915	49.51	±	4.329	23.47	±	13.6b	1.64	±	0.1356	93.31	±	58.81	14.81	±	2.046	6.125	±	3.92	36.9	±	7.469	1.64	±	0.1356	93.31	±	58.81
3				23.56	±	1.497	0.99	±	0.134	44.94	±	7.104	17.22	±	18.62	1.553	±	0.11a	105.6	±	59.56	14.13	±	1.835	4.859	±	1.71	35.82	±	1.988	1.553	±	0.11a	105.6	±	59.56
10				24.79	±	3.321	0.976	±	0.1335	48.08	±	6.38	11.48	±	9.99b	1.624	±	0.24	87.56	±	61.71	16.31	±	1.061	8.329	±	4.259	33.92	±	4.824	1.624	±	0.24	87.56	±	61.71
30				20.46	±	1.291	0.77	±	0.13*	44.52	±	8.704	30.8d			1.654	±	0.14a	46.5	±	23.45	16.86	±	1.914	7.831	±	2.75	31.78	±	2.028	1.654	±	0.14a	46.5	±	23.45
100				15.7	±	4.53**	0.62	±	0.16***	44.42	±	8.813	22.69	±	18.7b	1.754	±	0.17a	84.45	±	20.86	16.26	±	1.169	8.269	±	3.257	34.76	±	1.928	1.754	±	0.17a	84.45	±	20.86
300				17.42	±	2.31*	0.56	±	0.06***	48.06	±	7.029	20.92	±	13.4a	1.638	±	0.1112	67.83	±	29.41	17.46	±	4.244	13.87	±	6.668	35.87	±	3.041	1.638	±	0.1112	67.83	±	29.41
1000				13.28	±	2.37***	0.4	±	0.07***	52.76	±	13.87	22.26	±	8.943	1.426	±	0.4217	82.42	±	32.97	22.49	±	7.138	23.3	±	22.89	32.62	±	7.103	1.426	±	0.4217	82.42	±	32.97
1700				11.12	±	1.94***	0.31	±	0.07***	55.83	±	10.59	21.5±10.6a,e			1.634	±	0.23	78.72	±	36.32	23.19	±	6.271	25.7	±	18.9*	31.93	±	5.206	1.634	±	0.23	78.72	±	36.32
Dose response				D, T			D, T			D						-			-			D, T			D
females
0				40.24	±	5.51	1.272	±	0.1728	30.86	±	2.997	97.49	±	22.52	0.7783	±	0.1014	83.02	±	70.95	8.92	±	1.044	1.035	±	0.0848	23.8	±	1.174	0.7783	±	0.1014	83.02	±	70.95
3				31.63	±	9.589	1.372	±	0.1366	32.81	±	5.73	109.4	±	28.29	0.9523	±	0.06a	71.75	±	42.13	12.22	±	0.961	1.085	±	0.5981	27.72	±	0.6327	0.9523	±	0.06a	71.75	±	42.13
10				29.31	±	9.767	1.17	±	0.102	30.03	±	8.5	83.59	±	13.86	0.881	±	0.06229	211.5	±	357	11.05	±	2.125	1.194	±	0.5643	24.96	±	2.758	0.881	±	0.06229	211.5	±	357
30				29.93	±	8.319	1.056	±	0.1494	27.93	±	11.25	82.78	±	12.6	1.041	±	0.1051	155.7	±	112.9	12.74	±	2.83	1.129	±	0.2061	27.41	±	3.079	1.041	±	0.1051	155.7	±	112.9
100				29.34	±	2.058	1.184	±	0.115	30.65	±	2.48	66.76	±	20*	0.8279	±	0.1609	51.69	±	22.82	11.52	±	1.417	0.9749	±	0.1613	28.2	±	2.614	0.8279	±	0.1609	51.69	±	22.82
300				26.62	±	4.64*	0.97	±	0.16*	35.97	±	5.443	38.36	±	15.4***	0.8795	±	0.1639	95.37	±	67.16	11.63	±	0.7912	0.9982	±	0.2728	27.71	±	3.583	0.8795	±	0.1639	95.37	±	67.16
1000				23.48	±	3.72**	0.82	±	0.19***	28.35	±	7.497	22.16	±	7.65***	0.9849	±	0.3527	140.5	±	119.5	12.01	±	3.267	0.985	±	0.2516	28.81	±	3.873	0.9849	±	0.3527	140.5	±	119.5
1700				18.22	±	5.47***	0.61	±	0.14***	25.03	±	4.291	22.45	±	8.65***	1.1	±	0.13*	82.1	±	37.53	14.8	±	1.82*	1.082	±	0.3724	31.6	±	0.76**	1.1	±	0.13*	82.1	±	37.53
Dose response				D, T			D, T						D, T			+			-			D, T						D			D
Group mean ± SD. N=5. * p<0.05; ** p<0.01; *** p<0.001 vs. control
D, significant dose response (for results, see Table 2 in the text); T, significant trend
a n=4
b n=3
c n=2
d n=1
e One exceptionally high value excluded as an outlier
