# Supplementary material for: Toxicological Profile of Ultrapure 2,2′,3,4,4′,5,5′-Heptachlorbiphenyl (PCB 180) in Adult Rats
Source: PLoS One. 2014 Aug 19;9(8):e104639. doi: 10.1371/journal.pone.0104639 (PMC4138103; doi:10.1371/journal.pone.0104639)
Supplement: Table S7 — Liver and kidney retinoid amounts. (XLSX) [file pone.0104639.s007.xlsx]

## Sheet: Table S7
Table S7. Liver and kidney retinoid amount
	Liver												Kidney
Total dose mg/kg bw	Retinol µmol			Retinyl esters µmol			All-trans RA pmol			9-cis-4o-13,14-dh RA pmol			Retinol nmol			Retinyl esters nmol			All-trans RA pmol
males
0	0.292	±	0.04604	12.43	±	1.177	634.6	±	94.36	303	±	152a	16.12	±	3.321	7.065	±	5.593	40.9	±	13.6
3	0.278	±	0.05975	11.51	±	1.777	544.2	±	205.2	217.9	±	228.2	14.23	±	3.003	4.987	±	2.279	35.89	±	5.521
10	0.316	±	0.04037	12.52	±	1.916	632.2	±	193.3	162.6	±	137a	17.57	±	2.972	8.734	±	3.725	36.88	±	10.23
30	0.288	±	0.04087	10.69	±	1.289	623.1	±	147.7	389b			17.51	±	1.641	8.117	±	2.996	33.28	±	4.932
100	0.264	±	0.06878	10.27	±	1.615	744.2	±	104.1	433.6	±	363a	17.33	±	1.477	8.836	±	3.606	37.01	±	1.906
300	0.314	±	0.04336	10.06	±	0.3664	862.5	±	127.8	402.9	±	296c	18.21	±	3.351	14.53	±	6.509	37.82	±	4.031
1000	0.27	±	0.04899	8.2	±	1.7***	1077	±	314**	455.2	±	203	24.51	±	7.553	24.5	±	22.43	35.92	±	10.51
1700	0.23	±	0.03082	6.4	±	0.9***	1178	±	263***	454	±	270c,d	23.31	±	5.344	25.2	±	16.8*	32.35	±	5.149
Dose response	D			D, T			D, T						D, T			D, T
females
0	0.32	±	0.06	10.06	±	1.971	245.2	±	47.66	779.5	±	240.5	6.228	±	0.5795	0.7245	±	0.06011	16.66	±	1.026
3	0.256	±	0.08173	11.1	±	1.009	267.1	±	56.5	887.1	±	235.8	8.722	±	0.7388	0.7687	±	0.408	19.79	±	1.089
10	0.234	±	0.08325	9.314	±	0.6749	239.2	±	68.5	665.4	±	112.8	8.066	±	1.488	0.8768	±	0.4261	18.23	±	1.916
30	0.252	±	0.08556	8.81	±	1.66	230.8	±	91.69	690.6	±	134.2	9.25	±	2.17*	0.8182	±	0.1547	19.89	±	2.505
100	0.24	±	0.02345	9.732	±	1.363	252.3	±	31.23	542.5	±	126.3	8.422	±	1.081	0.7146	±	0.1314	20.62	±	2.074
300	0.244	±	0.0305	8.904	±	1.076	331.8	±	50.2	357.1	±	161**	8.453	±	0.8176	0.7308	±	0.2377	20.15	±	3.012
1000	0.242	±	0.03701	8.284	±	1.054	296	±	100.1	225.6	±	75.5***	8.953	±	2.672	0.7353	±	0.2125	21.53	±	4.10*
1700	0.212	±	0.05805	6.9	±	1.3**	289.1	±	54.25	261.4	±	112***	10.3	±	1.14***	0.7533	±	0.2566	22.04	±	1.06**
Dose response				D, T						D, T			D, T						D, T
Group mean ± SD. N=5, * p<0.05; ** p<0.01; *** p<0.001 vs. control
D, significant dose response (for results see Table 2 in the text); T, significant trend
a n=3
b n=1
c n=4
d One exceptionally high value excluded as an outlier
