# Supplementary material for: Toxicological Profile of Ultrapure 2,2′,3,4,4′,5,5′-Heptachlorbiphenyl (PCB 180) in Adult Rats
Source: PLoS One. 2014 Aug 19;9(8):e104639. doi: 10.1371/journal.pone.0104639 (PMC4138103; doi:10.1371/journal.pone.0104639)
Supplement: Table S9 — Cauda epididymal sperm counts. (XLSX) [file pone.0104639.s009.xlsx]

## Sheet: Table S9
Table S9. Cauda epididymal sperm counts
Total dose	Sperm density			Sperm count
mg/kg bw	106/g tissue			106/cauda epididymis
0	702	±	164	108	±	22.7
3
10
30
100
300
1000
1700	691	±	106	94	±	7.32
Group mean ± SD. N=5
