# Supplementary material for: Toxicological Profile of Ultrapure 2,2′,3,4,4′,5,5′-Heptachlorbiphenyl (PCB 180) in Adult Rats
Source: PLoS One. 2014 Aug 19;9(8):e104639. doi: 10.1371/journal.pone.0104639 (PMC4138103; doi:10.1371/journal.pone.0104639)
Supplement: Table S10 — Tibial geometry, densitometry and biomechanics. (XLSX) [file pone.0104639.s010.xlsx]

## Sheet: Table S10 
Table S10. Tibial geometry, densitometry and biomechanics
	Densitometry, diaphysis															Densitometry, metaphysis									Biomechanics, diaphysis
Total dose mg/kg bw	Cortical density mg/cm3			Cortical area mm2			Cortical thickness mm			Periosteal circumference mm			Endosteal circumference mm			Trabecular density mg/cm3			Trabecular area mm2			Total density mg/cm3			Stiffness Nm/mm			Yield Force N			Yield Deformation mm			Ultimate Force N			Ultimate Deformation mm
males
0	1316	±	8.939	4.068	±	0.2961	0.5522	±	0.0304	9.098	±	0.2678	5.629	±	0.1806	157.5	±	13.75	9.384	±	0.6684	465.8	±	13.54	240.524	±	40.1151	84.2679	±	16.1359	0.3689	±	0.0491988	133.269	±	13.2203	0.7533	±	0.0826384
3	1321	±	12.49	4.044	±	0.3537	0.559	±	0.03451	8.981	±	0.3131	5.468	±	0.1409	173.7	±	26.85	8.424	±	0.9451	493.4	±	17.49	224.681	±	31.3826	84.7584	±	11.395	0.42315	±	0.0687963	122.821	±	15.0608	0.88815	±	0.115029
10	1314	±	4.363	3.952	±	0.2992	0.544	±	0.0275	8.968	±	0.2757	5.551	±	0.1134	139.4	±	22.11	8.956	±	1.144	465	±	28.4	232.065	±	16.4602	71.9073	±	8.45028	0.33325	±	0.0655322	130.64	±	11.9364	0.72695	±	0.0925793
30	1316	±	9.28	4.078	±	0.1613	0.5564	±	0.02151	9.078	±	0.1536	5.582	±	0.1834	165.3	±	7.541	8.63	±	0.7779	485.1	±	19.96	241.642	±	32.2172	78.3819	±	25.3556	0.34565	±	0.149938	121.84	±	17.5509	0.7037	±	0.130421
100	1300	±	10.19	4.06	±	0.1327	0.5478	±	0.02899	9.141	±	0.2652	5.697	±	0.4061	159.3	±	15.81	9.574	±	0.9093	458.1	±	13.56	222.803	±	13.5473	87.0147	±	22.9845	0.39525	±	0.113901	129.884	±	10.1618	0.78585	±	0.0746579
300	1313	±	15.63	4.064	±	0.1483	0.5584	±	0.01172	9.034	±	0.1861	5.526	±	0.1524	149.5	±	18.94	8.85	±	0.3925	473.5	±	19.83	238.605	±	21.8501	68.9643	±	11.274	0.2945	±	0.0561541	131.503	±	19.2122	0.75795	±	0.0820915
1000	1306	±	9.527	3.882	±	0.2372	0.5386	±	0.02528	8.896	±	0.2279	5.512	±	0.1721	153.7	±	21.2	8.69	±	0.5837	467.9	±	29.56	208.674	±	9.41168	92.9988	±	23.3042	0.4464	±	0.129752	120.251	±	17.4324	0.7719	±	0.0783862
1700	1315	±	15.38	3.804	±	0.224	0.528	±	0.02829	8.861	±	0.1881	5.544	±	0.1853	163.8	±	22.21	8.64	±	0.4096	483.4	±	26.84	230.06	±	35.2315	81.2268	±	22.663	0.34565	±	0.0987327	118.456	±	15.9563	0.7688	±	0.0503452
Dose response				D
females
0	1312	±	4.644	3.254	±	0.1577	0.4878	±	0.01388	8.205	±	0.288	5.14	±	0.2998	216.4	±	16.68	5.41	±	0.4152	569.6	±	17.06	227.761	±	27.1135	71.4168	±	8.61941	0.3193	±	0.0369245	106.144	±	11.1886	0.63085	±	0.0919609
3	1315	±	7.391	3.252	±	0.2137	0.4922	±	0.02052	8.148	±	0.2503	5.055	±	0.1716	194.5	±	22.82	5.332	±	0.2559	569.7	±	10.27	248.098	±	28.5333	72.2016	±	15.4737	0.2914	±	0.0740521	108.381	±	10.711	0.6014	±	0.121381
10	1312	±	9.879	3.218	±	0.1307	0.4884	±	0.01346	8.123	±	0.198	5.055	±	0.1916	199.1	±	30.35	5.372	±	0.5261	571.3	±	42.24	238.267	±	26.6077	65.9232	±	16.1553	0.2945	±	0.109875	106.497	±	5.9355	0.63395	±	0.128683
30	1311	±	4.589	3.228	±	0.1055	0.4876	±	0.01315	8.144	±	0.1107	5.079	±	0.09138	211.4	±	24.06	5.52	±	0.3582	569.4	±	25.47	210.939	±	24.6516	81.2268	±	8.27769	0.3782	±	0.0603804	112.187	±	6.07808	0.7626	±	0.0813935
100	1307	±	2.818	3.214	±	0.09236	0.494	±	0.01488	8.055	±	0.1107	4.951	±	0.1432	209.4	±	38.97	4.99	±	0.5522	585.6	±	33.73	224.153	±	16.3074	79.6572	±	5.9833	0.3596	±	0.0433585	99.5519	±	4.99559	0.62155	±	0.063767
300	1310	±	5.502	3.264	±	0.0747	0.4966	±	0.008562	8.133	±	0.1588	5.012	±	0.1854	214	±	12.19	5.252	±	0.4618	581.3	±	22.63	221.854	±	12.7854	76.7142	±	16.596	0.341	±	0.0805404	104.221	±	9.05012	0.64015	±	0.0129682
1000	1309	±	6.008	3.23	±	0.1622	0.4948	±	0.01436	8.077	±	0.1987	4.968	±	0.1381	208.9	±	14.53	5.414	±	0.2953	574.4	±	13.96	226.136	±	10.943	71.4168	±	15.5482	0.3162	±	0.0660798	104.928	±	10.8359	0.6448	±	0.0719541
1700	1307	±	4.245	3.1	±	0.04301	0.4766	±	0.01369	8.004	±	0.07157	5.009	±	0.151	221.2	±	7.261	5.838	±	0.232	561.6	±	11.3	213.035	±	17.0743	60.4296	±	15.4114	0.2759	±	0.0604301	109.283	±	7.60765	0.6913	±	0.100362
Dose response																			D									D
Group mean ± SD. N=5
D, significant dose response (for results, see Table 2 in the text)
