# Supplementary material for: Toxicological Profile of Ultrapure 2,2′,3,4,4′,5,5′-Heptachlorbiphenyl (PCB 180) in Adult Rats
Source: PLoS One. 2014 Aug 19;9(8):e104639. doi: 10.1371/journal.pone.0104639 (PMC4138103; doi:10.1371/journal.pone.0104639)
Supplement: Table S13 — Transthyretin binding of monohydroxy metabolites of PCB 180. (XLSX) [file pone.0104639.s013.xlsx]

## Sheet: Table S13
Table S13. Transthyretin binding of monohydroxy metabolites of PCB 180
IC50 nM	Pilot experiment	Full dose-resonse experiments		Mean	SD	Reference
		Exp 1	Exp 2
T4	60.8	64.23	55	60.01	4.66544	This study
PCB 180	27% T4 displacement @10000 nM	-	-	>15000	-	Hamers et al. 2011
5-OH-PCB 183	92% T4 displacement @100 nM	18.13	21.06	19.595	2.07182	This study
3' OH-PCB 182	93% T4 displacement @100 nM	17.45	20.5	18.975	2.15668	This study
4'-OH-PCB 172	95% T4 displacement @100 nM	11.95	14.1	13.025	1.52028	This study
3'-OH-PCB 180	95% T4 displacement @100 nM	16.24	19.38	17.81	2.22032	This study
Relative potency	Pilot experiment	Full dose resonse experiments		Mean	SD	Reference
REP		Exp 1	Exp 2
T4	1	1	1	1	0	This study
PCB 180	-	-	-	<0.0038	-	Hamers et al. 2011
5-OH-PCB 183	-	3.54275	2.61159	3.07717	0.65843	This study
3' OH-PCB 182	-	3.6808	2.68293	3.18186	0.705605	This study
4'-OH-PCB 172	-	5.3749	3.90071	4.6378	1.04241	This study
3'-OH-PCB 180	-	3.95505	2.83798	3.39651	0.789889	This study
PCB 180		5-OH-PCB 183			3' OH-PCB 182				4'-OH-PCB 172				3'-OH-PCB 180
Reference
Hamers T, Kamstra JH, Cenijn PH, Pencikova K, Palkova L, Simeckova P, Vondracek J, Andersson PL, Stenberg M, Machala M (2011)
In vitro toxicity profiling of ultrapure non-dioxin-like polychlorinated biphenyl (NDL-PCB) congeners and their relative toxic contribution to PCB-mixtures in humans.
Toxicological Sciences 121: 88-100.
